# Supplementary material
Source: MDPI journal article supplement (https://www.mdpi.com/2076-3298/11/3/59)
Supplement: s1 [file s1]

**Table S1 – Ecosystem biodiversity and socioeconomic and well-being benefits report**

**The biodiversity of plants surveyed in the collaborative monitoring pathways - Terre dell'Aquilegia**

| Plant                                                         | Habitat | Genetic diversity | Ecosystem use, benefits and knowledge |
|---------------------------------------------------------------|---------|-------------------|---------------------------------------|
| <i>Acer monspessulanum</i> L.<br>Aceraceae                    |         |                   | landscape                             |
| <i>Acinos sardous</i> (Asch. et Levier) Arrigoni<br>Lamiaceae |         | endemic           | animal feed                           |
| <i>Achillea millefolium</i> L.<br>Asteraceae                  |         |                   |                                       |
| <i>Aegilops caudata</i> L.<br>Poaceae                         |         |                   | animal feed                           |
| <i>Aegilops geniculata</i> Roth<br>Poaceae                    |         |                   | animal feed                           |
| <i>Aetheorhiza bulbosa</i> (L.)<br>Coss.<br>Poaceae           |         |                   |                                       |
| <i>Agropyron repens</i> (L.)<br>Beauv.<br>Poaceae             |         |                   | animal feed                           |
| <i>Agrostis pallida</i> Dc.<br>Poaceae                        |         |                   |                                       |
| <i>Aira caryophyllea</i> L.<br>Poaceae                        |         |                   | animal feed                           |
| <i>Aira cupaniana</i> Guss.<br>Poaceae                        |         |                   |                                       |
| <i>Aira elegans</i> Willd. ex Gaudin<br>Poaceae               |         |                   |                                       |
| <i>Ajuga iova</i> L.<br>Lamiaceae                             |         |                   |                                       |
| <i>Alchemilla arvensis</i> Scop.<br>Rosaceae                  |         |                   | officinal<br>animal feed              |

|                                                                        |                                                                                 |         |                                             |
|------------------------------------------------------------------------|---------------------------------------------------------------------------------|---------|---------------------------------------------|
| <i>Alisma plantago-aquatica</i> L.<br>Alismataceae                     | 3170 Mediterranean temporary ponds<br>Source river                              |         | officinal<br>pigs                           |
| <i>Alnus glutinosa</i> (L.) Gaertn.<br>Betulaceae                      | 91E0 Alluvial forests with <i>Alnus Glutinosa</i> and <i>Fraxinus excelsior</i> |         |                                             |
| <i>Alopecurus bulbosus</i> Gouan<br>Poaceae                            |                                                                                 |         | animal feed                                 |
| <i>Alopecurus bulbosus</i> L.<br>Poaceae                               |                                                                                 |         |                                             |
| <i>Althaea cannabina</i> L.<br>Malvaceae                               |                                                                                 |         | animal feed                                 |
| <i>Althaea officinalis</i> L.<br>Malvaceae                             |                                                                                 |         | officinal<br>animal feed                    |
| <i>Althaea trilobata</i> L.<br>Malvaceae                               |                                                                                 |         | animal feed                                 |
| <i>Alyssum robertianum</i><br>Bernard ex Gren. & Godr.<br>Brassicaceae |                                                                                 |         | animal feed                                 |
| <i>Allium cepa</i> L.<br>Liliaceae                                     |                                                                                 |         | human nutrition<br>animal feed              |
| <i>Allium parviflorum</i> Viv.<br>Liliaceae                            |                                                                                 | endemic | animal feed                                 |
| <i>Allium roseum</i> L.<br>Liliaceae                                   |                                                                                 |         |                                             |
| <i>Allium sativum</i> L.<br>Liliaceae                                  | I2.2 Small-scale ornamental and domestic garden areas                           |         | human nutrition<br>animal feed              |
| <i>Allium subhirsutum</i> L.<br>Liliaceae                              |                                                                                 |         |                                             |
| <i>Allium triquetrum</i> L.<br>Liliaceae                               | I2.2 Small-scale ornamental and domestic garden areas                           |         | officinal<br>human nutrition<br>animal feed |
| <i>Amaranthus deflexus</i> L.<br>Amaranthaceae                         |                                                                                 |         | animal feed                                 |

|                                                                |  |  |                                                         |
|----------------------------------------------------------------|--|--|---------------------------------------------------------|
| <i>Ambrosinia bassi</i> L.<br>Araceae                          |  |  |                                                         |
| <i>Amelanchier ovalis</i> Medik.<br>Rosaceae                   |  |  | animal feed                                             |
| <i>Ammi majus</i> L.<br>Apiaceae                               |  |  | animal feed<br>only hay when<br>very hungry             |
| <i>Ammoides pusilla</i> (Brot.)<br>Breistr.<br>Apiaceae        |  |  |                                                         |
| <i>Anagallis arvensis</i> L.<br>Primulaceae                    |  |  |                                                         |
| <i>Anagyris foetida</i> L.<br>Fabaceae                         |  |  |                                                         |
| <i>Anchusa officinalis</i> L.<br>Boraginaceae                  |  |  | officinal<br>animal feed                                |
| <i>Andryala integrifolia</i> L.<br>Asteraceae                  |  |  |                                                         |
| <i>Anemone hortensis</i> L.<br>Ranunculaceae                   |  |  | toxic<br>landscape<br>garden                            |
| <i>Anemone palmata</i> L.<br>Ranunculaceae                     |  |  | toxic<br>landscape<br>garden<br>animal feed when<br>dry |
| <i>Anisantra diandra</i> (Roth)<br>Tutin ex Tzvelev<br>Poaceae |  |  | animal feed                                             |
| <i>Anthemis arvensis</i> L.<br>Asteraceae                      |  |  |                                                         |
| <i>Anthoxanthum odoratum</i> L.<br>Poaceae                     |  |  | animal feed                                             |
| <i>Anthyllis vulneraria</i> L.<br>Papilionaceae                |  |  | officinal<br>animal feed                                |
| <i>Antinoria agrostidea</i> (DC.)<br>Parl.<br>Poaceae          |  |  | animal feed                                             |

|                                                                      |                                                                  |         |                                          |
|----------------------------------------------------------------------|------------------------------------------------------------------|---------|------------------------------------------|
| <i>Anthriscus caucalis</i> M.<br>Bieb.<br>Poaceae                    |                                                                  |         | animal feed                              |
| <i>Apera spica-venti</i> (L.) P.<br>Beauv.<br>Poaceae                |                                                                  |         | animal feed                              |
| <i>Aphanes arvensis</i> L.<br>Rosaceae                               |                                                                  |         |                                          |
| <i>Apium graveolens</i> L.<br>Apiaceae                               |                                                                  |         | human nutrition<br>animal feed           |
| <i>Apium nodiflorum</i> (L.) Lag.<br>Apiaceae                        | I2.2 Small-scale ornamental and domestic garden areas            |         | toxic<br>animal feed                     |
| <i>Aquilegia<br/>nugorensis</i> Arrigoni &<br>Nardi<br>Ranunculaceae |                                                                  | endemic | toxic<br>landscape<br>garden             |
| <i>Aquilegia<br/>barbaricina</i> Arrigoni & Nardi<br>Ranunculaceae   |                                                                  | endemic | toxic<br>garden                          |
| <i>Aquilegia nuragica</i> Arrigoni & Nardi<br>Ranunculaceae          | 8210 Calcareous rocky slopes with chasmo-phytic vegetation       | endemic | toxic<br>landscape<br>garden             |
| <i>Arabis auriculata</i> Lam.<br>Brassicaceae                        |                                                                  |         | animal feed                              |
| <i>Arbutus unedo</i> L.<br>Ericaceae                                 | 9340 <i>Quercus ilex</i> and <i>Quercus rotundifolia</i> forests |         | human nutrition<br>animal feed<br>garden |
| <i>Arctium lappa</i> L.<br>Asteraceae                                |                                                                  |         |                                          |
| <i>Arenaria balearica</i> L.<br>Caryophyllaceae                      |                                                                  | endemic |                                          |
| <i>Arisarum vulgare</i> Targ.<br>Tozz.<br>Araceae                    |                                                                  |         |                                          |

|                                                                                    |                                                                   |         |                                |
|------------------------------------------------------------------------------------|-------------------------------------------------------------------|---------|--------------------------------|
| <i>Armeria morisii</i> Boiss.<br>Plumbaginaceae                                    | 8210 Calcareous rocky<br>slopes with chasmo-<br>phytic vegetation | endemic | landscape<br>animal feed       |
| <i>Armeria sardoa</i> Spr. subsp.<br><i>genargentea</i> Arrigoni<br>Plumbaginaceae |                                                                   | endemic | garden<br>animal feed          |
| <i>Artemisia arborescens</i> L.<br>Asteraceae                                      |                                                                   |         | officinal<br>goats             |
| <i>Arum pictum</i> L. fil.<br>Araceae                                              |                                                                   | endemic | toxic                          |
| <i>Arundo donax</i> L.<br>Poaceae                                                  |                                                                   |         |                                |
| <i>Asparagus acutifolius</i> L.<br>Asparagaceae                                    |                                                                   |         | human nutrition<br>animal feed |
| <i>Asperula pumila</i> Moris<br>Boraginaceae                                       |                                                                   |         | animal feed                    |
| <i>Asphodelus microcarpus</i><br>Salzm. et Viv.<br>Asphodelaceae                   |                                                                   |         | officinal, garden              |
| <i>Asterolinon linum-stellatum</i><br>(L.) Duby<br>Lysimachiaceae                  |                                                                   |         |                                |
| <i>Astragalus genargenteus</i><br>Moris<br>Papilionaceae                           |                                                                   | endemic | animal feed                    |
| <i>Astragalus glycyphyllos</i> L.<br>Papilionaceae                                 |                                                                   |         | animal feed                    |
| <i>Astragalus pelecinus</i><br>Barneby<br>Papilionaceae                            |                                                                   |         | animal feed                    |
| <i>Astragalus tuberosus</i> DC.<br>Papilionaceae                                   |                                                                   |         | animal feed                    |
| <i>Astrocarpus sesamoides</i> DC.<br>Papilionaceae                                 |                                                                   |         | animal feed                    |
| <i>Atractylis cancellata</i> L.<br>Asteraceae                                      |                                                                   |         | edible, officinal              |

|                                                          |  |         |                                                   |
|----------------------------------------------------------|--|---------|---------------------------------------------------|
| <i>Atriplex litorale</i> L.<br>Chenopodiaceae            |  |         | animal feed                                       |
| <i>Atropa belladonna</i> L.<br>Solanaceae                |  |         | toxic, officinal                                  |
| <i>Avena fatua</i> L.<br>Poaceae                         |  |         |                                                   |
| <i>Avena barbata</i> Potter<br>Poaceae                   |  |         | animal feed                                       |
| <i>Ballota nigra</i> L.<br>Lamiaceae                     |  |         |                                                   |
| <i>Barbarea rupicola</i> Moris<br>Brassicaceae           |  | endemic |                                                   |
| <i>Bellardia trixago</i> (L.) All.<br>Scrophulariaceae   |  |         |                                                   |
| <i>Bellis annua</i> L.<br>Asteraceae                     |  |         |                                                   |
| <i>Bellis perennis</i> L.<br>Asteraceae                  |  |         |                                                   |
| <i>Bellis sylvestris</i> Cyr.<br>Asteraceae              |  |         | animal feed                                       |
| <i>Bellium bellidioides</i> L.<br>Asteraceae             |  | endemic | animal feed                                       |
| <i>Berberis aetnensis</i> C. Presl<br>Berberidaceae      |  |         | officinal,<br>animal feed, land-<br>scape, garden |
| <i>Beta vulgaris</i> L.<br>Chenopodiaceae                |  |         | human nutrition<br>animal feed                    |
| <i>Bifora testiculata</i> (L.) Roth.<br>Apiaceae         |  |         |                                                   |
| <i>Biscutella auriculata</i> L.<br>Brassicaceae          |  |         | animal feed                                       |
| <i>Biscutella morisiana</i><br>Raffaelli<br>Brassicaceae |  | endemic | animal feed                                       |

|                                                               |                                                                                                                                        |         |                                             |
|---------------------------------------------------------------|----------------------------------------------------------------------------------------------------------------------------------------|---------|---------------------------------------------|
| <i>Bituminaria bituminosa</i> (L.)<br>C.H. Stirt.<br>Fabaceae |                                                                                                                                        |         | officinal<br>animal feed                    |
| <i>Borago morisiana</i> Bigazzi &<br>Ricceri<br>Boraginaceae  |                                                                                                                                        | endemic | animal feed                                 |
| <i>Borago officinalis</i> L.<br>Boraginaceae                  |                                                                                                                                        |         | officinal<br>human nutrition<br>animal feed |
| <i>Brachypodium distachyum</i><br>(L.) Beauv.<br>Poaceae      | 6220 Pseudo-steppe with<br>grasses and annuals of<br>the Thero-Brachy-<br>podietea<br>Natural and semi-natural<br>grassland formations |         | animal feed                                 |
| <i>Brachypodium retusum</i><br>(Pers.) Beauv.<br>Poaceae      |                                                                                                                                        |         | animal feed                                 |
| <i>Brassica</i> sp.<br>Brassicaceae                           |                                                                                                                                        |         | officinal<br>human nutrition<br>animal feed |
| <i>Brimeura fastigiata</i> (Viv.)<br>Chouard<br>Hyacinthaceae |                                                                                                                                        | endemic |                                             |
| <i>Briza media</i> L.<br>Poaceae                              |                                                                                                                                        |         | animal feed                                 |
| <i>Briza minor</i> L.<br>Poaceae                              |                                                                                                                                        |         |                                             |
| <i>Bromus erectus</i> Huds.<br>Poaceae                        |                                                                                                                                        |         | animal feed                                 |
| <i>Bromus hordeaceus</i> L.<br>Poaceae                        |                                                                                                                                        |         | animal feed                                 |
| <i>Bromus madritensis</i> L.<br>Poaceae                       |                                                                                                                                        |         | animal feed                                 |
| <i>Bromus sterilis</i> L. Poaceae                             |                                                                                                                                        |         | animal feed                                 |
| <i>Bryonia marmorata</i> E. Petit<br>Cucurbitaceae            |                                                                                                                                        |         |                                             |

|                                                               |                                                                   |  |                                                          |
|---------------------------------------------------------------|-------------------------------------------------------------------|--|----------------------------------------------------------|
| <i>Bunias erucago</i> L.<br>Brassicaceae                      |                                                                   |  |                                                          |
| <i>Bunium bulbocastanum</i> L.<br>Apiaceae                    |                                                                   |  | animal feed when<br>hay                                  |
| <i>Bupleurum fruticosum</i> L.<br>Brassicaceae                |                                                                   |  | animal feed when<br>hay<br>official<br>landscape, garden |
| <i>Calamagrostis arundinacea</i><br>Roth<br>Poaceae           |                                                                   |  | animal feed                                              |
| <i>Calamintha nepeta</i> (L.) Savi<br>Lamiaceae               |                                                                   |  |                                                          |
| <i>Calendula arvensis</i> L.<br>Asteraceae                    |                                                                   |  | landscape, garden                                        |
| <i>Calepina irregularis</i> (Asso)<br>Thell.<br>Brassicaceae  |                                                                   |  |                                                          |
| <i>Calicotome villosa</i> (Poiret.)<br>Link<br>Fabaceae       |                                                                   |  | landscape, garden                                        |
| <i>Campanula erinus</i> L.<br>Campanulaceae                   | 8210 Calcareous rocky<br>slopes with chasmo-<br>phytic vegetation |  |                                                          |
| <i>Capparis spinosa</i> L.<br>Capparaceae                     |                                                                   |  | human nutrition<br>animal feed<br>landscape, garden      |
| <i>Capsella bursa-pastoris</i> (L.)<br>Medik.<br>Brassicaceae |                                                                   |  | animal feed                                              |
| <i>Capsicum annuum</i> L.<br>Solanaceae                       |                                                                   |  | pigs feed                                                |
| <i>Cardamine flexuosa</i> With.<br>Brassicaceae               |                                                                   |  | animal feed                                              |
| <i>Carduus pycnocephalus</i> L.                               |                                                                   |  | animal feed                                              |



|                                                                                               |  |         |                                  |
|-----------------------------------------------------------------------------------------------|--|---------|----------------------------------|
| Asteraceae                                                                                    |  |         |                                  |
| <i>Carex divisa</i> Hudson<br>Cyperaceae                                                      |  |         |                                  |
| <i>Carex divulsa</i> Stokes<br>Cyperaceae                                                     |  |         |                                  |
| <i>Carex microcarpa</i> Bertol. ex<br>Moris<br>Cyperaceae                                     |  | endemic |                                  |
| <i>Carlina lanata</i> L.<br>Asteraceae                                                        |  |         |                                  |
| <i>Carlina racemosa</i> L.<br>Asteraceae                                                      |  |         |                                  |
| <i>Catabrosa aquatica</i> (L.) P.<br>Beauv.<br>Poaceae                                        |  |         | animal feed                      |
| <i>Catapodium rigidum</i> (L.)<br>Hubbard<br>Poaceae                                          |  |         |                                  |
| <i>Celtis australis</i> L.<br>Ulmaceae                                                        |  |         |                                  |
| <i>Centaurea calcitrapa</i> L.<br>Asteraceae                                                  |  |         |                                  |
| <i>Centaurea filiformis</i> Viv.<br>subsp. <i>filiformis</i><br>Asteraceae                    |  |         | animal feed<br>landscape, garden |
| <i>Centaurea napifolia</i> L.<br>Asteraceae                                                   |  |         |                                  |
| <i>Centaurium erythraea</i> Rafn.<br>Gentianaceae                                             |  |         | animal feed                      |
| <i>Cephalaria squamiflora</i><br>subsp. <i>mediterranea</i> (Viv.)<br>Pignatti<br>Dipsacaceae |  |         | animal feed                      |
| <i>Cerastium brachypetalum</i><br>Desp. ex Pers.                                              |  |         | animal feed                      |

|                                                                     |                                                  |         |                                |
|---------------------------------------------------------------------|--------------------------------------------------|---------|--------------------------------|
| <i>Cerastium glomeratum</i><br>Thuill.<br>Caryophyllaceae           |                                                  |         |                                |
| <i>Cerastium supramontanum</i><br>Arrigoni<br>Caryophyllaceae       |                                                  | endemic | animal feed                    |
| <i>Ceratonia siliqua</i> L.<br>Fabaceae                             | 9320 <i>Olea</i> and <i>Ceratonia</i><br>forests |         | animal feed                    |
| <i>Cerinthe major</i> L.<br>Boraginaceae                            |                                                  |         |                                |
| <i>Chenopodium album</i> L.<br>subsp. <i>album</i><br>Amaranthaceae |                                                  |         | human nutrition<br>animal feed |
| <i>Chondrilla juncea</i> L.<br>Asteraceae                           |                                                  |         | human nutrition<br>animal feed |
| <i>Cicer arietinum</i> L.<br>Fabaceae                               |                                                  |         | human nutrition<br>animal feed |
| <i>Cichorium intybus</i> L.<br>Asteraceae                           |                                                  |         | officinal<br>animal feed       |
| <i>Cirsium vulgare</i> (Savi) Ten.<br>Asteraceae                    |                                                  |         |                                |
| <i>Cistus corsicus</i> L.<br>Cistaceae                              |                                                  |         | goats<br>landscape, garden     |
| <i>Cistus incanus</i> L.<br>Cistaceae                               |                                                  |         | goats<br>landscape, garden     |
| <i>Cistus monspeliensis</i> L.<br>Cistaceae                         |                                                  |         | goats<br>landscape, garden     |
| <i>Citrus aurantium</i> L.<br>Rutaceae                              |                                                  |         | human nutrition<br>pigs        |
| <i>Clematis cirrhosa</i> L.<br>Ranunculaceae                        |                                                  |         | toxic                          |

|                                                                                   |                                                                                |         |                            |
|-----------------------------------------------------------------------------------|--------------------------------------------------------------------------------|---------|----------------------------|
| <i>Clematis vitalba</i> L.<br>Ranunculaceae                                       |                                                                                |         | toxic                      |
| <i>Clinopodium sardoum</i><br>(Asch. & Levier) Peruzzi &<br>F. Conti<br>Lamiaceae |                                                                                | endemic |                            |
| <i>Colchicum cupanii</i> Guss.<br>Colchicaceae                                    |                                                                                |         | landscape, garden          |
| <i>Colutea arborescens</i> L.<br>Fabaceae                                         |                                                                                |         | animal feed                |
| <i>Convolvulus arvensis</i> L.<br>Convolvulaceae                                  |                                                                                |         | officinal<br>animal feed   |
| <i>Coronilla valentina</i> L.<br>Fabaceae                                         |                                                                                |         |                            |
| <i>Corydalis solida</i> Sw.<br>Papaveraceae                                       |                                                                                |         | animal feed                |
| <i>Corynephorus canescens</i> (L.)<br>P. Beauv.<br>Poaceae                        |                                                                                |         | animal feed                |
| <i>Crambe hispanica</i> L.<br>Brassicaceae                                        |                                                                                |         | animal feed                |
| <i>Crepis bellidifolia</i> Loisel.<br>Asteraceae                                  | 8130 Western Mediterranean and thermophilous scree<br>Rocky habitats and caves |         |                            |
| <i>Crepis versicaria</i> L.<br>Asteraceae                                         |                                                                                |         | animal feed                |
| <i>Crocus minimus</i> DC.<br>Iridaceae                                            |                                                                                | endemic | toxic<br>landscape, garden |
| <i>Cruciata glabra</i> (L.) Ehrend<br>Rubiaceae                                   |                                                                                |         |                            |
| <i>Cutandia divaricata</i> (Desf.)<br>Benth<br>Poaceae                            |                                                                                |         | animal feed                |

|                                                                     |  |         |                                  |
|---------------------------------------------------------------------|--|---------|----------------------------------|
| <i>Cyclamen repandum</i> Sm.<br>Primulaceae                         |  |         | officinal<br>landscape, garden   |
| <i>Cymbalaria muelleri</i> (Moris)<br>Chevall.<br>Plantaginaceae    |  | endemic | animal feed                      |
| <i>Cymbopogon hirsutus</i> (L.)<br>Janchen<br>Poaceae               |  |         |                                  |
| <i>Cynara cardunculus</i> L.<br>Asteraceae                          |  |         | human nutrition<br>animal feed   |
| <i>Cynodon dactylon</i> (L.) Pers.<br>Poaceae                       |  |         | animal feed                      |
| <i>Cynoglossum barbaricinum</i><br>Arrigoni & Selvi<br>Boraginaceae |  | endemic | animal feed                      |
| <i>Cynoglossum creticum</i><br>Miller<br>Boraginaceae               |  |         |                                  |
| <i>Cynosurus echinatus</i> L.<br>Poaceae                            |  |         | animal feed                      |
| <i>Cynosurus elegans</i> Desf.<br>Poaceae                           |  |         | animal feed                      |
| <i>Cytisus argenteus</i> L.<br>Fabaceae                             |  |         | animal feed                      |
| <i>Cytisus scoparius</i> (L.) Link<br>Fabaceae                      |  |         | officinal                        |
| <i>Cytisus spinosus</i> (L.) Lam.<br>Fabaceae                       |  |         | toxic<br>landscape, garden       |
| <i>Cytisus villosus</i> Pourr.<br>Fabaceae                          |  |         | animal feed<br>landscape, garden |
| <i>Chamaemelum mixtum</i> (L.)<br>All.<br>Asteraceae                |  |         |                                  |

|                                                      |                                                            |         |                                            |
|------------------------------------------------------|------------------------------------------------------------|---------|--------------------------------------------|
| <i>Chelidonium majus</i> L.<br>Papaveraceae          |                                                            |         |                                            |
| <i>Chenopodium album</i> L.<br>Chenopodiaceae        | I2.2 Small-scale ornamental and domestic garden areas      |         | official<br>animal feed                    |
| <i>Chenopodium murale</i> L.<br>Chenopodiaceae       |                                                            |         |                                            |
| <i>Chenopodium polyspermum</i> L.<br>Chenopodiaceae  |                                                            |         | animal feed                                |
| <i>Chondrilla juncea</i> L.<br>Asteraceae            |                                                            |         | animal feed                                |
| <i>Chrysopogon gryllus</i> (L.) Trin.<br>Poaceae     |                                                            |         | animal feed                                |
| <i>Dactylis glomerata</i> L.<br>Poaceae              |                                                            |         | animal feed                                |
| <i>Danthonia decumbens</i> (L.) DC.<br>Poaceae       |                                                            |         | animal feed                                |
| <i>Daphne gnidium</i> L.<br>Thymeleaceae             |                                                            |         | toxic                                      |
| <i>Dasypyrum villosum</i> (L.) Borbas<br>Poaceae     |                                                            |         |                                            |
| <i>Daucus carota</i> L.<br>Apiaceae                  |                                                            |         | official<br>human nutrition<br>animal feed |
| <i>Daucus muricatus</i> L.<br>Apiaceae               |                                                            |         | animal feed                                |
| <i>Delphinium pictum</i> Willd.<br>Ranunculaceae     |                                                            | endemic | landscape, garden                          |
| <i>Desmazeria rigida</i> (L.) Tutin<br>Poaceae       |                                                            |         |                                            |
| <i>Dianthus cyatophorus</i> Moris<br>Caryophyllaceae | 8210 Calcareous rocky slopes with chasmo-phytic vegetation |         |                                            |

|                                                                              |  |         |                                        |
|------------------------------------------------------------------------------|--|---------|----------------------------------------|
| <i>Digitalis purpurea</i> L.<br>Plantaginaceae                               |  |         | toxic, officinal,<br>landscape, garden |
| <i>Dioscorea communis</i> ( L.)<br>Caddick & Wilkin<br>Dioscoreaceae         |  |         |                                        |
| <i>Diplotaxis</i> sp.<br>Brassicaceae                                        |  |         | animal feed                            |
| <i>Dittrichia viscosa</i> (L.) Rchb.<br>Asteraceae                           |  |         |                                        |
| <i>Dorychinum pentaphyllum</i><br>Scop.<br>Fabaceae                          |  |         | animal feed                            |
| <i>Draba verna</i> L.<br>Brassicaceae                                        |  |         |                                        |
| <i>Drymocallis corsica</i><br>(Soleirol. ex Lehm.) Kurtto<br>Rosaceae        |  |         | animal feed                            |
| <i>Eballium elaterium</i> (L.) A.<br>Rich.<br>Cucurbitaceae                  |  |         |                                        |
| <i>Echium anchusoides</i> Bacch.,<br>Brullo & Selvi<br>Boraginaceae          |  |         | animal feed                            |
| <i>Echium italicum</i> L.<br>Rubiaceae                                       |  |         |                                        |
| <i>Echium vulgare</i> L. subsp.<br><i>grandiflorum</i> Desf.<br>Boraginaceae |  |         | animal feed                            |
| <i>Ephedra nebrodensis</i><br>Tineo<br>Ephedraceae                           |  | endemic | toxic, officinal,<br>landscape, garden |
| <i>Epilobium hirsutum</i> L.<br>Onagraceae                                   |  |         | animal feed                            |
| <i>Eragrostis pilosa</i> (L.) P.<br>Beauv.<br>Poaceae                        |  |         | animal feed                            |

|                                                                                                        |                                                                                               |         |                            |
|--------------------------------------------------------------------------------------------------------|-----------------------------------------------------------------------------------------------|---------|----------------------------|
| <i>Erica arborea</i> L.<br>Ericaceae                                                                   |                                                                                               |         | goats<br>landscape, garden |
| <i>Erica scoparia</i> L.<br>Ericaceae                                                                  |                                                                                               |         | goats                      |
| <i>Erodium cicutarium</i> (L.)<br>L'Hér.<br>Geraniaceae                                                |                                                                                               |         | animal feed                |
| <i>Erodium purpureum</i> Vill.<br>Geraniaceae                                                          |                                                                                               |         |                            |
| <i>Eryngium campestre</i> L.<br>Apiaceae                                                               |                                                                                               |         |                            |
| <i>Eryngium corniculatum</i><br>Lam.<br>Apiaceae                                                       |                                                                                               |         | animal feed                |
| <i>Eryngium maritimum</i> L.<br>Apiaceae                                                               | 1210 Annual vegetation<br>of drift lines                                                      |         | goats                      |
| <i>Euphorbia characias</i> L.<br>Euphorbiaceae                                                         | 5430 Endemic phryganas<br>of the Euphorbio-Verbas-<br>cion Sclerophyllous scrub<br>(matorral) |         | toxic                      |
| <i>Euphorbia dendroides</i> L.<br>Euphorbiaceae                                                        | 5330 Thermo-Mediterra-<br>nean and pre-desert<br>scrub<br>Sclerophyllous scrub<br>(matorral)  |         | toxic<br>landscape, garden |
| <i>Euphorbia peplus</i> L.<br>Euphorbiaceae                                                            |                                                                                               |         | toxic                      |
| <i>Euphorbia semiperfoliata</i><br>Viv.<br>Euphorbiaceae                                               |                                                                                               | endemic | toxic                      |
| <i>Euphorbia pithyusa</i> subsp. <i>c<br/>upanii</i> (Guss. ex Bertol.)<br>Radcl.-Sm.<br>Euphorbiaceae | 5320 Low formations of<br>Euphorbia close to cliffs<br>Sclerophyllous scrub<br>(matorral)     | endemic | toxic                      |
| <i>Euphrasia nana</i> (Rouy)<br>Prain<br>Orobanchaceae                                                 |                                                                                               | endemic | animal feed                |

|                                                            |                                                                 |         |                                                                                   |
|------------------------------------------------------------|-----------------------------------------------------------------|---------|-----------------------------------------------------------------------------------|
| <i>Evax pygmaea</i> (L.) Brot.<br>Asteraceae               |                                                                 |         |                                                                                   |
| <i>Ferula communis</i> L.<br>Apiaceae                      |                                                                 |         | toxic<br>animal feed when<br>hungry<br>shaking the plant<br>to let fall the seeds |
| <i>Festuca geniculata</i> (L.) Lag.<br>& Rodr.<br>Poaceae  |                                                                 |         | animal feed                                                                       |
| <i>Festuca rubra</i> L.<br>Poaceae                         |                                                                 |         |                                                                                   |
| <i>Festuca ovina</i> L.<br>Poaceae                         |                                                                 |         | animal feed                                                                       |
| <i>Festuca valesiaca</i> Schleich.<br>ex Gaudin<br>Poaceae |                                                                 |         | animal feed                                                                       |
| <i>Ficus carica</i> L.<br>Moraceae                         |                                                                 |         | human nutrition,<br>officinal<br>goats (new leaves)<br>pigs (fruits)              |
| <i>Filago pyramidata</i> L.<br>Asteraceae                  |                                                                 |         |                                                                                   |
| <i>Foeniculum vulgare</i> Mill.<br>Apiaceae                | I2.2 Small-scale orna-<br>mental and domestic gar-<br>den areas |         | human nutrition,<br>officinal<br>animal feed                                      |
| <i>Fumaria officinalis</i> L.<br>Papaveraceae              |                                                                 |         | animal feed                                                                       |
| <i>Gagea granatelli</i> Parl.<br>Liliaceae                 |                                                                 |         | landscape, garden                                                                 |
| <i>Galactites tomentosa</i><br>Moench<br>Asteraceae        |                                                                 |         |                                                                                   |
| <i>Galium corsicum</i> Sprengel<br>Rubiaceae               |                                                                 | endemic | animal feed                                                                       |



|                                                                                  |                                                                                   |         |                                      |
|----------------------------------------------------------------------------------|-----------------------------------------------------------------------------------|---------|--------------------------------------|
| <i>Galium glaucophyllum</i><br>Schmid<br>Rubiaceae                               |                                                                                   | endemic |                                      |
| <i>Galium parisiense</i> L.<br>Rubiaceae                                         |                                                                                   |         |                                      |
| <i>Galium scabrum</i> L.<br>Rubiaceae                                            |                                                                                   |         |                                      |
| <i>Gastridium ventricosum</i> (Gouan) Schinz & Thell.<br>Poaceae                 |                                                                                   |         | animal feed                          |
| <i>Genista corsica</i> (Loisel.) DC.<br>in Lam. & DC.<br>Fabaceae                | 5330 Thermo-Mediterranean and pre-desert scrub<br>Sclerophyllous scrub (matorral) | endemic | goats<br>landscape, garden           |
| <i>Gentiana lutea</i> L.<br>Gentianaceae                                         | I2.2 Small-scale ornamental and domestic garden areas                             |         | officinal<br>pigs                    |
| <i>Geranium pusillum</i> L.<br>Geraniaceae                                       |                                                                                   |         | animal feed when dried               |
| <i>Geranium robertianum</i> L.<br>Geraniaceae                                    |                                                                                   |         | animal feed                          |
| <i>Geranium rotundifolium</i> L.<br>Geraniaceae                                  |                                                                                   |         |                                      |
| <i>Geranium tuberosum</i> Lem.<br>Geraniaceae                                    |                                                                                   |         | animal feed when dried               |
| <i>Gladiolus italicus</i> Miller<br>Iridaceae                                    |                                                                                   |         | landscape, garden                    |
| <i>Glaucium flavum</i> Crantz<br>Papaveraceae                                    |                                                                                   |         | toxic, officinal, ornamental, garden |
| <i>Glebionis segetum</i> (L.)<br>Fourr.<br>Asteraceae                            |                                                                                   |         | animal feed                          |
| <i>Halopeplis amplexicaulis</i><br>(Vahl) Ces., Pass. & Gibelli<br>Amaranthaceae |                                                                                   |         | pigs                                 |

|                                                              |  |         |                  |
|--------------------------------------------------------------|--|---------|------------------|
| <i>Haynaldia villosa</i> (L.) Schur.<br>Poaceae              |  |         |                  |
| <i>Hedera helix</i> L.<br>Araliaceae                         |  |         | toxic            |
| <i>Hedysarium coronarium</i> L.<br>Fabaceae                  |  |         | animal feed      |
| <i>Helleborus argutifolius</i> Viv.<br>Ranunculaceae         |  |         | lanscape         |
| <i>Helianthemum morisianum</i><br>Bertol.<br>Cistaceae       |  | endemic | lanscape, garden |
| <i>Helosciadium nodiflorum</i> L.<br>Apiaceae                |  |         | animal feed      |
| <i>Hippocrepis comosa</i> L.<br>Fabaceae                     |  |         | animal feed      |
| <i>Hipocrepis emerus</i> (L.) Las-<br>sen<br>Fabaceae        |  |         | animal feed      |
| <i>Holcus lanatus</i> L.<br>Poaceae                          |  |         |                  |
| <i>Hordeum bulbosum</i> L.<br>Poaceae                        |  |         |                  |
| <i>Hordeum leporinum</i> Link<br>Poaceae                     |  |         | animal feed      |
| <i>Hordeum murinum</i> L.<br>Poaceae                         |  |         | animal feed      |
| <i>Hordeum vulgare</i> L.<br>Poaceae                         |  |         | animal feed      |
| <i>Hymenocarpus circinnatus</i><br>(L.) Savi<br>Fabaceae     |  |         |                  |
| <i>Hyoseris radiata</i> L.<br>Asteraceae                     |  |         | animal feed      |
| <i>Hyparrehenia hirta</i> (L.)<br>Stapf in Oliver<br>Poaceae |  |         |                  |

|                                                                                                                |                                                          |         |                                                        |
|----------------------------------------------------------------------------------------------------------------|----------------------------------------------------------|---------|--------------------------------------------------------|
| <i>Hypericum hircinum</i> L.<br>Hypericaceae                                                                   |                                                          |         | animal feed when<br>hungry (sprouts<br>and when dried) |
| <i>Hypericum perforatum</i> L.<br>Hypericaceae                                                                 |                                                          |         | officinal                                              |
| <i>Hypochaeris radicata</i> L.<br>Asteraceae                                                                   |                                                          |         | animal feed                                            |
| <i>Iberis integerrima</i> Moris<br>Brassicaceae                                                                |                                                          | endemic | animal feed                                            |
| <i>Ilex aquifolium</i> L.<br>Aquifoliaceae                                                                     |                                                          |         |                                                        |
| <i>Inula viscosa</i> (L.) Aiton<br>Asteraceae                                                                  |                                                          |         | officinal                                              |
| <i>Juglans regia</i> L.<br>Juglandaceae                                                                        |                                                          |         | human nutrition<br>animal feed                         |
| <i>Juncus acutus</i> L.<br>Juncaceae                                                                           |                                                          |         |                                                        |
| <i>Juncus articulatus</i> L.<br>Juncaceae                                                                      |                                                          |         |                                                        |
| <i>Juniperus nana</i> Willd.<br>Cupressaceae                                                                   | 5210 Arborescent ma-<br>torral with <i>Juniperus spp</i> |         | toxic, officinal                                       |
| <i>Juniperus oxycedrus</i> L.<br>subsp. <i>oxycedrus</i><br>Cupressaceae                                       |                                                          |         | animal feed                                            |
| <i>Koeleria cristata</i> (L.) Hyl.<br>Poaceae                                                                  |                                                          |         | animal feed                                            |
| <i>Lactuca sativa</i> L. subsp.<br><i>serriola</i> (L.) Galasso, Banfi,<br>Bartolucci & Ardenghi<br>Asteraceae |                                                          |         | human nutrition<br>animal feed                         |
| <i>Lagurus ovatus</i> L.<br>Poaceae                                                                            |                                                          |         | animal feed                                            |
| <i>Lamarckia aurea</i> (L.)<br>Moench.<br>Poaceae                                                              |                                                          |         | animal feed                                            |
| <i>Laserpitium gallicum</i> L.                                                                                 |                                                          |         | animal feed                                            |

|                                                    |  |         |                                              |
|----------------------------------------------------|--|---------|----------------------------------------------|
| <i>Laserpitium siler</i> L.<br>Apiaceae            |  |         | animal feed                                  |
| <i>Lathyrus clymenum</i> L.<br>Fabaceae            |  |         | animal feed                                  |
| <i>Lathyrus sphaericus</i> Retz.<br>Fabaceae       |  |         |                                              |
| <i>Latyrus gorgoni</i> Parl.<br>Fabaceae           |  |         | animal feed                                  |
| <i>Latyrus latifolius</i> L.<br>Fabaceae           |  |         | animal feed                                  |
| <i>Latyrus pratensis</i> L.<br>Fabaceae            |  |         | animal feed                                  |
| <i>Laurus nobilis</i> L.<br>Lauraceae              |  |         | human nutrition,<br>officinal<br>animal feed |
| <i>Lavandula stoechas</i> L.<br>Lamiaceae          |  |         | officinal, land-<br>scape, garden            |
| <i>Lavatera olbia</i> L.<br>Malvaceae              |  |         | landscape, garden                            |
| <i>Leontodon tuberosus</i> L.<br>Asteraceae        |  |         |                                              |
| <i>Leopoldia comosa</i> (L.) Parl.<br>Asparagaceae |  |         | animal feed                                  |
| <i>Lepidium ruderae</i> L.<br>Brassicaceae         |  |         | animal feed                                  |
| <i>Leucojum aestivum</i> L.<br>Amaryllidaceae      |  |         | animal feed                                  |
| <i>Ligustrum lucidum</i> Ait.<br>Oleaceae          |  |         | animal feed<br>landscape, garden             |
| <i>Lilium maritimum</i> L.<br>Linaceae             |  |         | officinal<br>animal feed                     |
| <i>Lilium tenuifolium</i> L.<br>Linaceae           |  |         | animal feed                                  |
| <i>Limonium morisianum</i><br>Arrigoni             |  | endemic | animal feed                                  |

|                                                             |                                                                                |         |                                             |
|-------------------------------------------------------------|--------------------------------------------------------------------------------|---------|---------------------------------------------|
| Plumbaginaceae                                              |                                                                                |         |                                             |
| <i>Linaria muelleri</i> Moris<br>Plantaginaceae             | 8130 Western Mediterranean and thermophilous scree<br>Rocky habitats and caves | endemic | animal feed                                 |
| <i>Linaria triphylla</i> (L.) Mill.<br>Plantaginaceae       |                                                                                |         | animal feed                                 |
| <i>Linum usitatissimum</i> L.<br>Linaceae                   |                                                                                |         | officinal, landscape, garden<br>animal feed |
| <i>Lobularia maritima</i> (L.)<br>Desv.<br>Brassicaceae     |                                                                                |         |                                             |
| <i>Logfia gallica</i> (L.) Cosson et<br>Germ.<br>Asteraceae |                                                                                |         |                                             |
| <i>Lolium multiflorum</i> Lam.<br>Poaceae                   |                                                                                |         | animal feed                                 |
| <i>Lolium perenne</i> L.<br>Poaceae                         |                                                                                |         | animal feed                                 |
| <i>Lolium rigidum</i> L.<br>Poaceae                         |                                                                                |         |                                             |
| <i>Lonicera implexa</i> Aiton.<br>Caprifoliaceae            | 9340 <i>Quercus ilex</i> and<br><i>Quercus rotundifolia</i> forests            |         | officinal<br>goats                          |
| <i>Lophochloa cristata</i> (L.) Hyl.<br>Poaceae             |                                                                                |         |                                             |
| <i>Lotus corniculatus</i> L.<br>Fabaceae                    |                                                                                |         | animal feed                                 |
| <i>Lotus maritimus</i> L.<br>Fabaceae                       |                                                                                |         | animal feed                                 |
| <i>Lotus ornithopodioides</i> L.<br>Fabaceae                |                                                                                |         |                                             |
| <i>Lupinus angustifolius</i> L.<br>Fabaceae                 |                                                                                |         | animal feed                                 |

|                                                                       |                                                       |  |                                             |
|-----------------------------------------------------------------------|-------------------------------------------------------|--|---------------------------------------------|
| <i>Luzula forsteri</i> (Sm.) DC.<br>Juncaceae                         |                                                       |  |                                             |
| <i>Lysimachia minima</i> (L.) U.<br>Manns & Anderb.<br>Lysimachiaceae |                                                       |  | animal feed                                 |
| <i>Lythrum salicaria</i> L.<br>Lythraceae                             |                                                       |  | animal feed                                 |
| <i>Malope malacoides</i> L.<br>Malvaceae                              |                                                       |  | animal feed                                 |
| <i>Malva cretica</i> Cav.<br>Malvaceae                                |                                                       |  | animal feed                                 |
| <i>Malva sylvestris</i> L.<br>Malvaceae                               | I2.2 Small-scale ornamental and domestic garden areas |  | human nutrition<br>officinal<br>animal feed |
| <i>Marrubium vulgare</i> L.<br>Lamiaceae                              |                                                       |  | officinal<br>animal feed                    |
| <i>Matthiola incana</i> (L.) R. Br.<br>Brassicaceae                   | 1210 Annual vegetation of drift lines                 |  | lanscape, garden                            |
| <i>Matthiola sinuata</i> R. Br.<br>Brassicaceae                       |                                                       |  | animal feed                                 |
| <i>Medicago arabica</i> Huds.<br>Fabaceae                             |                                                       |  | animal feed                                 |
| <i>Medicago ciliaris</i> Knock.<br>Fabaceae                           |                                                       |  | animal feed                                 |
| <i>Medicago intertexta</i> (L.)<br>Mill.<br>Fabaceae                  |                                                       |  | animal feed                                 |
| <i>Medicago minima</i> (L.)<br>Bartal.<br>Fabaceae                    |                                                       |  |                                             |
| <i>Medicago murex</i> Willd.<br>Fabaceae                              |                                                       |  |                                             |
| <i>Melica ciliata</i> L.<br>Poaceae                                   |                                                       |  | animal feed                                 |
| <i>Melica minuta</i> L.<br>Poaceae                                    |                                                       |  | animal feed                                 |

|                                                                               |                                                  |         |                                                                   |
|-------------------------------------------------------------------------------|--------------------------------------------------|---------|-------------------------------------------------------------------|
| <i>Melilotus officinalis</i> Lam.<br>Papilionaceae                            |                                                  |         | animal feed                                                       |
| <i>Mentha acquatica</i> L.<br>Lamiaceae                                       |                                                  |         | officinal<br>human nutrition<br>animal feed                       |
| <i>Mentha insularis</i> Req. ex<br>Gren. et Godr.<br>Lamiaceae                |                                                  | endemic | officinal<br>human nutrition<br>animal feed                       |
| <i>Mentha pulegium</i> L.<br>Lamiaceae                                        |                                                  |         | officinal<br>animal feed                                          |
| <i>Mercurialis corsica</i> Coss. &<br>Kralik<br>Euphorbiaceae                 |                                                  |         | animal feed                                                       |
| <i>Mespilus germanica</i> L.<br>Rosaceae                                      |                                                  |         | human nutrition<br>pigs                                           |
| <i>Micromeria cordata</i> (Moris<br>ex Bertol.) Moris<br>Lamiaceae            |                                                  | endemic | animal feed                                                       |
| <i>Micromeria graeca</i> (L.)<br>Benth. ex Rchb.<br>Lamiaceae                 |                                                  |         | goats                                                             |
| <i>Minuartia hybrida</i> (Vill.)<br>Schischkein<br>Caryophyllaceae            |                                                  |         |                                                                   |
| <i>Misopates orontium</i> (L.) Raf.<br>Plantaginaceae                         |                                                  |         |                                                                   |
| <i>Montia fontana</i> L. subsp.<br><i>variabilis</i> Walters<br>Portulacaceae |                                                  |         |                                                                   |
| <i>Myrtus communis</i> L.<br>Myrtaceae                                        | 9320 <i>Olea</i> and <i>Ceratonia</i><br>forests |         | officinal,<br>human nutrition<br>animal feed<br>landscape, garden |
| <i>Narcissus tazetta</i> L.<br>Amaryllidaceae                                 |                                                  |         | lanscape, garden                                                  |

|                                                                                |                                                                                                 |         |                                                                   |
|--------------------------------------------------------------------------------|-------------------------------------------------------------------------------------------------|---------|-------------------------------------------------------------------|
| <i>Nasturtium officinale</i> R.<br>Br.<br>Brassicaceae                         | I2.2 Small-scale ornamental and domestic garden areas                                           |         | officinal<br>human nutrition<br>animal feed                       |
| <i>Nerium oleander</i> L.<br>Apocynaceae                                       | 92D0 Southern riparian galleries and thickets (Nerio – Tamaricetea and Securinegion tinctoriae) |         | landscape, garden                                                 |
| <i>Nigella damascena</i> L.<br>Ranunculaceae                                   |                                                                                                 |         | animal feed when dried                                            |
| <i>Notobasis syriaca</i> (L.) Cass.<br>Asteraceae                              |                                                                                                 |         |                                                                   |
| <i>Oenanthe lisae</i> Moris<br>Apiaceae                                        |                                                                                                 | endemic | toxic                                                             |
| <i>Olea europaea</i> L.<br>Oleaceae                                            | 9320 <i>Olea</i> and <i>Ceratonia</i> forests                                                   |         | officinal<br>human nutrition<br>animal feed                       |
| <i>Ononis reclinata</i> L.<br>Papilionaceae                                    |                                                                                                 | endemic |                                                                   |
| <i>Ononis spinosa</i> L.<br>Papilionaceae                                      |                                                                                                 |         | pigs                                                              |
| <i>Onopordum illyricum</i> L.<br>Asteraceae                                    |                                                                                                 |         |                                                                   |
| <i>Ophrys morisii</i> (Martelli)<br>Soò in Keller et al.<br>Orchidaceae        |                                                                                                 |         |                                                                   |
| <i>Opopanax chironium</i> Koch<br>Apiaceae                                     |                                                                                                 |         | animal feed                                                       |
| <i>Opuntia ficus-indica</i> Mill.<br>Cactaceae                                 |                                                                                                 |         | officinal<br>human nutrition<br>pigs, smooth soft parts thornless |
| <i>Ornithogalum sandalioticum</i><br>(Tor. ex Garb.) Zahariadi<br>Asparagaceae |                                                                                                 | endemic |                                                                   |



|                                                                          |  |         |                             |
|--------------------------------------------------------------------------|--|---------|-----------------------------|
| <i>Ornithopus compressus</i> L.<br>Fabaceae                              |  |         |                             |
| <i>Ornithopus perpusillus</i> L.<br>Fabaceae                             |  |         | animal feed                 |
| <i>Ornithopus pinnatus</i> (Miller) Druce<br>Fabaceae                    |  |         |                             |
| <i>Oryzopsis miliacea</i> (L.)<br>Asch. et Schweinf.<br>Poaceae          |  |         |                             |
| <i>Osyris alba</i> L.<br>Santalaceae                                     |  |         | animal feed                 |
| <i>Oxalis annua</i> L.<br>Oxalidaceae                                    |  |         | animal feed                 |
| <i>Paeonia morisii</i> Cesca,<br>Bernardo & N. G. Passal.<br>Paeoniaceae |  |         | toxic, landscape,<br>garden |
| <i>Pancratium illyricum</i> L.<br>Amaryllidaceae                         |  | endemic | toxic, landscape,<br>garden |
| <i>Panicum repens</i> L.<br>Poaceae                                      |  |         | animal feed                 |
| <i>Papaver rhoeas</i> L.<br>Papaveraceae                                 |  |         | toxic                       |
| <i>Parentucellia viscosa</i> (L.)<br>Caruel<br>Asteraceae                |  |         |                             |
| <i>Parietaria judaica</i> L.<br>Urticaceae                               |  |         | animal feed                 |
| <i>Paronychia echinulate</i><br>Chater<br>Caryophyllaceae                |  |         |                             |
| <i>Pastinaca divaricata</i> Desf.<br>Apiaceae                            |  |         | animal feed                 |
| <i>Petrorhagia prolifera</i> (L.)<br>P.W. Ball.<br>Caryophyllaceae       |  |         |                             |

|                                                                             |                                                                                                                                                      |  |                                                                 |
|-----------------------------------------------------------------------------|------------------------------------------------------------------------------------------------------------------------------------------------------|--|-----------------------------------------------------------------|
| <i>Petroselinum hortense</i><br>Hoffm.<br>Apiaceae                          |                                                                                                                                                      |  | officinal<br>human nutrition                                    |
| <i>Phagnalon rupestre</i> (L.) Dc.<br>Asteraceae                            |                                                                                                                                                      |  |                                                                 |
| <i>Phagnalon saxatile</i> (L.)<br>Coss.<br>Asteraceae                       |                                                                                                                                                      |  |                                                                 |
| <i>Phalaris arundinacea</i> L.<br>Poaceae                                   |                                                                                                                                                      |  | animal feed                                                     |
| <i>Phalaris canariensis</i> L.<br>Poaceae                                   |                                                                                                                                                      |  | animal feed                                                     |
| <i>Phaseolus vulgaris</i> L.<br>Fabaceae                                    |                                                                                                                                                      |  | human nutrition<br>animal feed                                  |
| <i>Phillyrea angustifolia</i> L.<br>Oleaceae                                | 9340 <i>Quercus ilex</i> and<br><i>Quercus rotundifolia</i> for-<br>ests                                                                             |  | goats<br>lanscape, garden                                       |
| <i>Phleum paniculatum</i> Huds.<br>Poaceae                                  |                                                                                                                                                      |  | animal feed                                                     |
| <i>Phleum pratense</i> L.<br>Poaceae                                        |                                                                                                                                                      |  | animal feed                                                     |
| <i>Picris echioides</i> L.<br>Asteraceae                                    |                                                                                                                                                      |  |                                                                 |
| <i>Pilosella ziziana</i> (Tausch)<br>F.W. Schultz & Sch. Bip.<br>Asteraceae |                                                                                                                                                      |  |                                                                 |
| <i>Piptatherum miliaceum</i> (L.)<br>Cosson<br>Poaceae                      |                                                                                                                                                      |  |                                                                 |
| <i>Pistacia lentiscus</i> L.<br>Anacardiaceae                               | 9320 <i>Olea</i> and <i>Ceratonia</i><br>forests<br>5320 Low formations of<br><i>Euphorbia</i> close to cliffs<br>Sclerophyllous scrub<br>(matorral) |  | officinal<br>human nutrition<br>animal feed<br>lanscape, garden |
| <i>Pistacia terebinthus</i> L.<br>Anacardiaceae                             | 9340 <i>Quercus ilex</i> and<br><i>Quercus rotundifolia</i> for-<br>ests                                                                             |  | lanscape, garden                                                |

|                                                                                                   |                                                                                |         |                                |
|---------------------------------------------------------------------------------------------------|--------------------------------------------------------------------------------|---------|--------------------------------|
| <i>Pisum sativum</i> L.<br>Fabaceae                                                               |                                                                                |         | human nutrition<br>animal feed |
| <i>Plantago bellardi</i> All.<br>Plantaginaceae                                                   |                                                                                |         |                                |
| <i>Plantago coronopus</i> L.<br>Plantaginaceae                                                    |                                                                                |         |                                |
| <i>Plantago lanceolata</i> L.<br>Plantaginaceae                                                   |                                                                                |         | animal feed                    |
| <i>Plantago subulata</i> L. subsp.<br><i>insularis</i> (Gren. & Godr.)<br>Nyman<br>Plantaginaceae | 8130 Western Mediterranean and thermophilous scree<br>Rocky habitats and caves | endemic | animal feed                    |
| <i>Plumbago europaea</i> L.<br>Plumbaginaceae                                                     |                                                                                |         | animal feed                    |
| <i>Poa annua</i> L.<br>Poaceae                                                                    |                                                                                |         |                                |
| <i>Polygala monspeliaca</i> L.<br>Polygalaceae                                                    |                                                                                |         | animal feed                    |
| <i>Polygala sardoa</i> Chodat<br>Polygalaceae                                                     |                                                                                | endemic | animal feed                    |
| <i>Polygonum aviculare</i> L.<br>Polygonaceae                                                     |                                                                                |         |                                |
| <i>Polygonum scoparium</i> Req.<br>Ex Loisel.<br>Polygonaceae                                     |                                                                                | endemic |                                |
| <i>Polypogon monspeliensis</i> (L.)<br>Desf.<br>Poaceae                                           |                                                                                |         | animal feed                    |
| <i>Portulaca oleracea</i> L.<br>Portulacaceae                                                     |                                                                                |         | pigs                           |
| <i>Potentilla crassinervia</i> Viv.<br>Rosaceae                                                   |                                                                                |         | animal feed                    |
| <i>Potentilla rupestris</i> L.<br>Rosaceae                                                        |                                                                                |         | animal feed                    |
| <i>Poterium sanguisorba</i> L.<br>Rosaceae                                                        |                                                                                |         | officinal<br>animal feed       |

|                                                            |  |         |                                                     |
|------------------------------------------------------------|--|---------|-----------------------------------------------------|
| <i>Primula vulgaris</i> Huds<br>Primulaceae                |  |         | animal feed                                         |
| <i>Prospero autumnale</i> (L.)<br>Speta<br>Asparagaceae    |  |         | toxic                                               |
| <i>Prunus armeniaca</i> L.<br>Rosaceae                     |  |         | human nutrition<br>pigs                             |
| <i>Prunus avium</i> L.<br>Rosaceae                         |  |         | human nutrition<br>animal feed                      |
| <i>Prunus communis</i> Arc.<br>Rosaceae                    |  |         | human nutrition<br>pigs                             |
| <i>Prunus domestica</i> L.<br>Rosaceae                     |  |         | human nutrition<br>pigs                             |
| <i>Prunus persica</i> Stock<br>Rosaceae                    |  |         | human nutrition<br>pigs                             |
| <i>Prunus prostrata</i> Labill.<br>Rosaceae                |  |         | animal feed                                         |
| <i>Psirulus incurvus</i> (Gouan)<br>Sch. et Th.<br>Poaceae |  |         |                                                     |
| <i>Ptilostemon casabonae</i> (L.)<br>Greuter<br>Asteraceae |  | endemic |                                                     |
| <i>Ptychotis sardoa</i> Pign. et<br>Metlesics<br>Apiaceae  |  | endemic |                                                     |
| <i>Pulicaria odora</i> (L.) Rei-<br>chenb.<br>Asteraceae   |  |         |                                                     |
| <i>Punica granatum</i> L.<br>Lythraceae                    |  |         | human nutrition<br>animal feed<br>landscape, garden |

|                                                             |                                                                                                                     |        |                                                                 |
|-------------------------------------------------------------|---------------------------------------------------------------------------------------------------------------------|--------|-----------------------------------------------------------------|
| <i>Quercus ilex</i> L.<br>Fagaceae                          | 9340 <i>Quercus ilex</i> and<br><i>Quercus rotundifolia</i><br>6310 Dehesas with ever-<br>green <i>Quercus spp.</i> | Edible | human nutrition<br>(acorns)<br>animal feed<br>landscape, garden |
| <i>Quercus pubescens</i> Willd.<br>Fagaceae                 |                                                                                                                     |        | animal feed<br>landscape, garden                                |
| <i>Quercus suber</i> L.<br>Fagaceae                         | 6310 Dehesas with ever-<br>green <i>Quercus spp.</i>                                                                |        | animal feed<br>landscape, garden                                |
| <i>Raphanus raphanistrum</i> L.<br>Brassicaceae             |                                                                                                                     |        | human nutrition<br>animal feed                                  |
| <i>Ranunculus aquatilis</i> L.<br>Ranunculaceae             | 3290 Intermittently flow-<br>ing Mediterranean rivers<br>of the Paspalo-Agrostid-<br>ion<br>Freshwater habitats     |        | pigs                                                            |
| <i>Ranunculus gramineus</i> L.<br>Ranunculaceae             |                                                                                                                     |        | animal feed                                                     |
| <i>Ranunculus macrophyl-<br/>lus</i> Desf.<br>Ranunculaceae |                                                                                                                     |        | animal feed                                                     |
| <i>Ranunculus sardous</i> Crantz.<br>Ranunculaceae          |                                                                                                                     |        | animal feed                                                     |
| <i>Raphanus raphanistrum</i> L.<br>Brassicaceae             | I2.2 Small-scale ornamen-<br>tal and domestic garden<br>areas                                                       |        | human nutrition<br>animal feed                                  |
| <i>Reichardia picroides</i> (L.)<br>Roth<br>Asteraceae      | I2.2 Small-scale ornamen-<br>tal and domestic garden<br>areas                                                       |        | human nutrition<br>animal feed                                  |
| <i>Reseda lutea</i> L.<br>Resedaceae                        |                                                                                                                     |        | animal feed                                                     |
| <i>Rhagadiolus stellatus</i> (L.)<br>Willd.<br>Asteracea    |                                                                                                                     |        |                                                                 |
| <i>Rhamnus alaternus</i> L.<br>Rhamnaceae                   | 9340 <i>Quercus ilex</i> and<br><i>Quercus rotundifolia</i> for-<br>ests                                            |        | animal feed                                                     |

|                                                    |                                                                  |         |                                                                               |
|----------------------------------------------------|------------------------------------------------------------------|---------|-------------------------------------------------------------------------------|
| <i>Ridolfia segetum</i> Moris<br>Apiaceae          |                                                                  |         | animal feed                                                                   |
| <i>Romulea columnae</i> Seb. et Mauri<br>Iridaceae |                                                                  |         |                                                                               |
| <i>Romulea ligustica</i> Parl.<br>Iridaceae        |                                                                  |         | animal feed                                                                   |
| <i>Romulea requienii</i> Parl.<br>Iridaceae        |                                                                  | endemic | toxic<br>animal feed when dried                                               |
| <i>Rosa canina</i> L.<br>Rosaceae                  |                                                                  |         | officinal,<br>animal feed when hungry (seeds and fruits)<br>landscape, garden |
| <i>Rosa seraphini</i> Viv.<br>Rosaceae             |                                                                  |         | officinal,<br>animal feed when hungry (seeds and fruits)<br>landscape, garden |
| <i>Rosmarinus officinalis</i> L.<br>Lamiaceae      |                                                                  |         | officinal<br>human nutrition<br>animal feed<br>landscape, garden              |
| <i>Rubia peregrina</i> L.<br>Rubiaceae             | 9340 <i>Quercus ilex</i> and <i>Quercus rotundifolia</i> forests |         |                                                                               |
| <i>Rubus fruticosus</i> L.<br>Rosaceae             |                                                                  |         | animal feed                                                                   |
| <i>Rubus ulmifolius</i> Schott.<br>Rosaceae        |                                                                  |         | officinal<br>animal feed                                                      |
| <i>Rumex acetosa</i> L.<br>Polygonaceae            | I2.2 Small-scale ornamental and domestic garden areas            |         | human nutrition<br>animal feed                                                |
| <i>Rumex pulcher</i> L.<br>Polygonaceae            | I2.2 Small-scale ornamental and domestic garden areas            |         | human nutrition<br>animal feed                                                |

|                                                                                           |                                                                                |         |                                                    |
|-------------------------------------------------------------------------------------------|--------------------------------------------------------------------------------|---------|----------------------------------------------------|
| <i>Rumex sanguineus</i> L.<br>Polygonaceae                                                |                                                                                |         | animal feed                                        |
| <i>Rumex scutatus</i> L.<br>Polygonaceae                                                  | 8130 Western Mediterranean and thermophilous scree<br>Rocky habitats and caves |         |                                                    |
| <i>Rumex suffocatus</i> Moris ex Bertol.<br>Polygonaceae                                  |                                                                                |         | animal feed                                        |
| <i>Ruscus aculeatus</i> L.<br>Asparagaceae                                                |                                                                                |         | officinal                                          |
| <i>Ruta corsica</i> DC<br>Rutaceae                                                        |                                                                                | endemic | toxic<br>animal feed when dried                    |
| <i>Salix pedicellata</i> Desf.<br>Salicaceae                                              |                                                                                |         |                                                    |
| <i>Salvia verbenaca</i> L.<br>Lamiaceae                                                   |                                                                                |         |                                                    |
| <i>Sambucus nigra</i> L.<br>Caprifoliaceae                                                |                                                                                |         | officinal<br>animal feed<br>landscape, garden      |
| <i>Samolus valerandi</i> L.<br>Primulaceae                                                |                                                                                |         |                                                    |
| <i>Sanguisorba minor</i> L.<br>Rosaceae                                                   |                                                                                |         | goats                                              |
| <i>Santolina insularis</i> (Gemm. ex Fiori) Arrigoni<br>Asteracea                         |                                                                                | endemic | officinal<br>goats when hungry and the plant dried |
| <i>Saponaria ocymoides</i> L.<br>Caryophyllaceae                                          |                                                                                |         | animal feed when dried<br>toxic                    |
| <i>Saponaria officinalis</i> L.<br>Caryophyllaceae                                        |                                                                                |         |                                                    |
| <i>Saxifraga pedemontana</i> All. subsp. <i>cervicornis</i> (Viv.) Engl.<br>Saxifragaceae | 8210 Calcareous rocky slopes with chasmo-phytic vegetation                     | endemic | animal feed<br>officinal, landscape, garden        |

|                                                                                    |  |         |                                    |
|------------------------------------------------------------------------------------|--|---------|------------------------------------|
| <i>Scandix pecten veneris</i> L.<br>Apiaceae                                       |  |         |                                    |
| <i>Scilla obtusifolia</i> Poir.<br>Asparagaceae                                    |  |         | animal feed when<br>dried<br>toxic |
| <i>Scolymus hispanicus</i> L.<br>Asteraceae                                        |  |         |                                    |
| <i>Scorpiurus muricatus</i> L.<br>subsp. <i>sulcatus</i> L.<br>Fabaceae            |  |         | animal feed                        |
| <i>Scorzonera callosa</i> Moris<br>Asteraceae                                      |  | endemic | animal feed                        |
| <i>Scrophularia peregrina</i> L.<br>Scrophulariaceae                               |  |         | animal feed                        |
| <i>Scrophularia trifoliata</i> L.<br>Scrophulariaceae                              |  | endemic | animal feed<br>landscape, garden   |
| <i>Sedum sediforme</i> (Jacq.) Pau<br>Crassulaceae                                 |  |         | animal feed                        |
| <i>Senecio erraticus</i> Bertol.<br>Asteraceae                                     |  |         |                                    |
| <i>Senecio vulgaris</i> L.<br>Asteraceae                                           |  |         |                                    |
| <i>Seseli bocconeii</i> Guss. subsp.<br><i>praecox</i> Gamisans<br>Apiaceae        |  | endemic | animal feed                        |
| <i>Sesleria insularis</i> Sommier<br>subsp. <i>barbaricina</i> Arrigoni<br>Poaceae |  | endemic | animal feed<br>landscape, garden   |
| <i>Setaria glauca</i> (L.) Beauv.<br>Poaceae                                       |  |         |                                    |
| <i>Sherardia arvensis</i> L.<br>Boraginaceae                                       |  |         |                                    |
| <i>Sideritis romana</i> L.<br>Lamiaceae                                            |  |         |                                    |
| <i>Silene alba</i> (Miller) Krause<br>Caryophyllaceae                              |  |         | animal feed                        |



|                                                              |                                                                          |         |                                                                    |
|--------------------------------------------------------------|--------------------------------------------------------------------------|---------|--------------------------------------------------------------------|
| <i>Silene gallica</i> L.<br>Caryophyllaceae                  |                                                                          |         | animal feed                                                        |
| <i>Silene vulgaris</i><br>(Moench) Garcke<br>Caryophyllaceae |                                                                          |         | animal feed                                                        |
| <i>Silybum marianum</i> (L.)<br>Gaertn.<br>Asteraceae        |                                                                          |         | officinal<br>human nutrition,<br>animal feed when<br>tender shoots |
| <i>Sinapsis arvensis</i> L.<br>Brassicaceae                  |                                                                          |         |                                                                    |
| <i>Sisymbrium erysimoides</i><br>Desf.<br>Apiaceae           |                                                                          |         | animal feed                                                        |
| <i>Sisymbrium officinal</i> (L.)<br>Scop.<br>Apiaceae        |                                                                          |         | officinal<br>animal feed                                           |
| <i>Smilax aspera</i> L<br>Apiaceae<br>Smilacaceae            | 9340 <i>Quercus ilex</i> and<br><i>Quercus rotundifolia</i> for-<br>ests |         | officinal<br>animal feed                                           |
| <i>Smyrniolum olusatrum</i> L.<br>Apiaceae                   |                                                                          |         | animal feed                                                        |
| <i>Solanum lycopersicum</i> L.<br>Solanaceae                 |                                                                          |         | human nutrition<br>pigs                                            |
| <i>Solanum melongena</i> L<br>Solanaceae                     |                                                                          |         | human nutrition<br>pigs                                            |
| <i>Solanum nigrum</i> L.<br>Solanaceae                       |                                                                          |         |                                                                    |
| <i>Solanum tuberosum</i> L.<br>Solanaceae                    |                                                                          |         | human nutrition<br>pigs                                            |
| <i>Soleirolia soleirolii</i> (Req.)<br>Dandy<br>Urticaceae   |                                                                          | endemic |                                                                    |
| <i>Sonchus oleraceus</i> L.<br>Asteraceae                    |                                                                          |         | human nutrition<br>animal feed                                     |

|                                                                                                   |  |         |                                |
|---------------------------------------------------------------------------------------------------|--|---------|--------------------------------|
| <i>Sonchus tenerrimus</i> L.<br>Asteraceae                                                        |  |         |                                |
| <i>Spergula arvensis</i> L.<br>Caryophyllaceae                                                    |  |         |                                |
| <i>Sphenopus divaricatus</i><br>(Gouan) Rchb.<br>Poaceae                                          |  |         | animal feed                    |
| <i>Spinacia oleracea</i> L.<br>Chenopodiaceae                                                     |  |         | human nutrition<br>animal feed |
| <i>Stachys corsica</i> Pers.<br>Lamiaceae                                                         |  | endemic | animal feed                    |
| <i>Stachys glutinosa</i> L.<br>Lamiaceae                                                          |  | endemic | animal feed                    |
| <i>Staphisagria requienii</i> (DC.)<br>subsp. <i>picta</i> (Willd.) Pe-<br>ruzzi<br>Ranunculaceae |  | endemic |                                |
| <i>Stellaria media</i> (L.) Vill.<br>Caryophyllaceae                                              |  |         |                                |
| <i>Sternbergia lutea</i> Ker-Gawl.<br>Amaryllidaceae                                              |  |         | animal feed                    |
| <i>Stipa bromoides</i> (L.) Dörfl.<br>Poaceae                                                     |  |         | animal feed                    |
| <i>Stipa capensis</i> Thumb.<br>Poaceae                                                           |  |         | animal feed                    |
| <i>Stipa juncea</i> L.<br>Poaceae                                                                 |  |         | animal feed                    |
| <i>Taeniatherum caput-medu-<br/>sae</i> (L.) Nevski<br>Poaceae                                    |  |         | animal feed                    |
| <i>Taraxacum officinal</i> Weber<br>Asteraceae                                                    |  |         | goats                          |
| <i>Taxus baccata</i> L.<br>Taxaceae                                                               |  |         | official                       |

|                                                      |                                                                                     |         |                                                                   |
|------------------------------------------------------|-------------------------------------------------------------------------------------|---------|-------------------------------------------------------------------|
| <i>Teline monspessulana</i> (L.) C. Koch<br>Fabaceae |                                                                                     |         |                                                                   |
| <i>Teucrium chamaedrys</i> L.<br>Lamiaceae           |                                                                                     |         | officinal<br>animal feed                                          |
| <i>Teucrium marum</i> L.<br>Lamiaceae                |                                                                                     | endemic |                                                                   |
| <i>Thalictrum minus</i> L.<br>Ranunculaceae          |                                                                                     |         |                                                                   |
| <i>Thapsia garganica</i> L.<br>Apiaceae              |                                                                                     |         | toxic                                                             |
| <i>Thlaspi brevistylum</i> Mutel<br>Brassicaceae     |                                                                                     | endemic | animal feed                                                       |
| <i>Thymelaea hirsuta</i> (L.) Endl.<br>Thymelaeaceae | 5320 Low formations of Euphorbia close to cliffs<br>Sclerophyllous scrub (matorral) |         | animal feed                                                       |
| <i>Thymus catharine</i> Camarda<br>Lamiaceae         |                                                                                     | endemic | officinal<br>human nutrition,<br>animal feed<br>landscape, garden |
| <i>Thypha latifolia</i> L.<br>Typhaceae              |                                                                                     |         |                                                                   |
| <i>Tolpis virgata</i> (Desf.) Bertol.<br>Asteraceae  |                                                                                     |         |                                                                   |
| <i>Tordylium apulum</i> L.<br>Apiaceae               |                                                                                     |         |                                                                   |
| <i>Torilis nodosa</i> (L.) Gaertner<br>Apiaceae      |                                                                                     |         |                                                                   |
| <i>Tribulus terrestris</i> L.<br>Zygophyllaceae      |                                                                                     |         |                                                                   |
| <i>Trifolium arvense</i> L.<br>Fabaceae              |                                                                                     |         |                                                                   |
| <i>Trifolium campestre</i> Schreb.<br>Fabaceae       |                                                                                     |         | animal feed                                                       |

|                                                              |  |  |             |
|--------------------------------------------------------------|--|--|-------------|
| <i>Trifolium cherleri</i> L.<br>Fabaceae                     |  |  |             |
| <i>Trifolium fragiferum</i> L.<br>Fabaceae                   |  |  |             |
| <i>Trifolium glomeratum</i> L.<br>Fabaceae                   |  |  |             |
| <i>Trifolium hirtum</i> All.<br>Fabaceae                     |  |  | animal feed |
| <i>Trifolium lappaceum</i> L.<br>Fabaceae                    |  |  | animal feed |
| <i>Trifolium ligusticum</i> Balbis<br>ex Loisel.<br>Fabaceae |  |  |             |
| <i>Trifolium nigrescens</i> Viv.                             |  |  |             |
| <i>Trifolium purpureum</i> Loisel.<br>Fabaceae               |  |  | animal feed |
| <i>Trifolium repens</i> L.<br>Fabaceae                       |  |  | animal feed |
| <i>Trifolium stellatum</i> L.<br>Fabaceae                    |  |  |             |
| <i>Trifolium subterraneum</i> L.<br>Fabaceae                 |  |  | animal feed |
| <i>Trigonella foenum-<br/>graecum</i> L.<br>Fabaceae         |  |  | animal feed |
| <i>Trisetaria pubescens</i> (Lam.)<br>Kerguelen<br>Poaceae   |  |  | animal feed |
| <i>Trisetum gracile</i> Boiss.<br>Poaceae                    |  |  | animal feed |
| <i>Tuberaria guttata</i> (L.) Fourr.<br>Cistaceae            |  |  |             |
| <i>Urospermum dalechampi</i> (L.)<br>Schmidt<br>Asteraceae   |  |  |             |

|                                                                          |  |         |                                |
|--------------------------------------------------------------------------|--|---------|--------------------------------|
| <i>Urospermum picroides</i> (L.)<br>Desf.<br>Asteraceae                  |  |         |                                |
| <i>Urtica atrovirens</i> Req. ex<br>Loisel.<br>Urticaceae                |  | endemic | animal feed when<br>dried      |
| <i>Urtica dioica</i> L.<br>Urticaceae                                    |  |         |                                |
| <i>Valerianella microcarpa</i><br>Loisel.<br>Valerianaceae               |  |         |                                |
| <i>Ventenata dubia</i> (Leers)<br>Coss.<br>Poaceae                       |  |         | animal feed                    |
| <i>Verbascum thapsus</i> L.<br>Scrophulariaceae                          |  |         | officinal<br>animal feed       |
| <i>Verbena officinalis</i> L.<br>Verbenaceae                             |  |         |                                |
| <i>Veronica arvensis</i> L.<br>Verbenaceae                               |  |         |                                |
| <i>Viburnum tinus</i> L.<br>Caprifoliaceae                               |  |         |                                |
| <i>Vicia cracca</i> L.<br>Fabaceae                                       |  |         | animal feed                    |
| <i>Vicia disperma</i> DC.<br>Fabaceae                                    |  |         |                                |
| <i>Vicia faba</i> L.<br>Fabaceae                                         |  |         | human nutrition<br>animal feed |
| <i>Vicia hirsuta</i> (L.) S. F. Gray<br>Fabaceae                         |  |         |                                |
| <i>Vicia lutea</i> L. subsp. <i>vestita</i><br>(Boiss.) Rouy<br>Fabaceae |  |         |                                |
| <i>Vicia monantha</i> Retz.<br>Fabaceae                                  |  |         | animal feed                    |
| <i>Vicia pubescens</i> (Dc.) Link<br>Fabaceae                            |  |         |                                |

|                                                           |  |         |                                             |
|-----------------------------------------------------------|--|---------|---------------------------------------------|
| <i>Vicia sepium</i> L.<br>Fabaceae                        |  |         | animal feed                                 |
| <i>Vicia villosa</i> Roth<br>Fabaceae                     |  |         |                                             |
| <i>Vigna unguiculata</i> (L.)<br>Fabaceae                 |  |         | officinal<br>human nutrition<br>animal feed |
| <i>Vinca sardoa</i> (Stearn) Pi-<br>gnatti<br>Apocynaceae |  | endemic | landscape, garden                           |
| <i>Vitex agnus-castus</i> L.<br>Verbenaceae               |  |         | officinal, land-<br>scape, garden           |
| <i>Vitis vinifera</i> L.<br>Vitaceae                      |  |         | human nutrition<br>animal feed              |
| <i>Vulpia ciliata</i> (Danth.) Link<br>Poaceae            |  |         | animal feed                                 |
| <i>Xanthium spinosum</i> L.<br>Asteraceae                 |  |         |                                             |
